# Supplementary material for: TIMP1 shapes an immunosuppressive microenvironment by regulating anoikis to promote the progression of clear cell renal cell carcinoma
Source: publisher site journal article supplement (doi:10.18632/aging.205005), 2023-09-08
Supplement: Supplementary file [file aging-v15i17-205005-supplementary-material-SD1.pdf]

**SUPPLEMENTARY FIGURES**

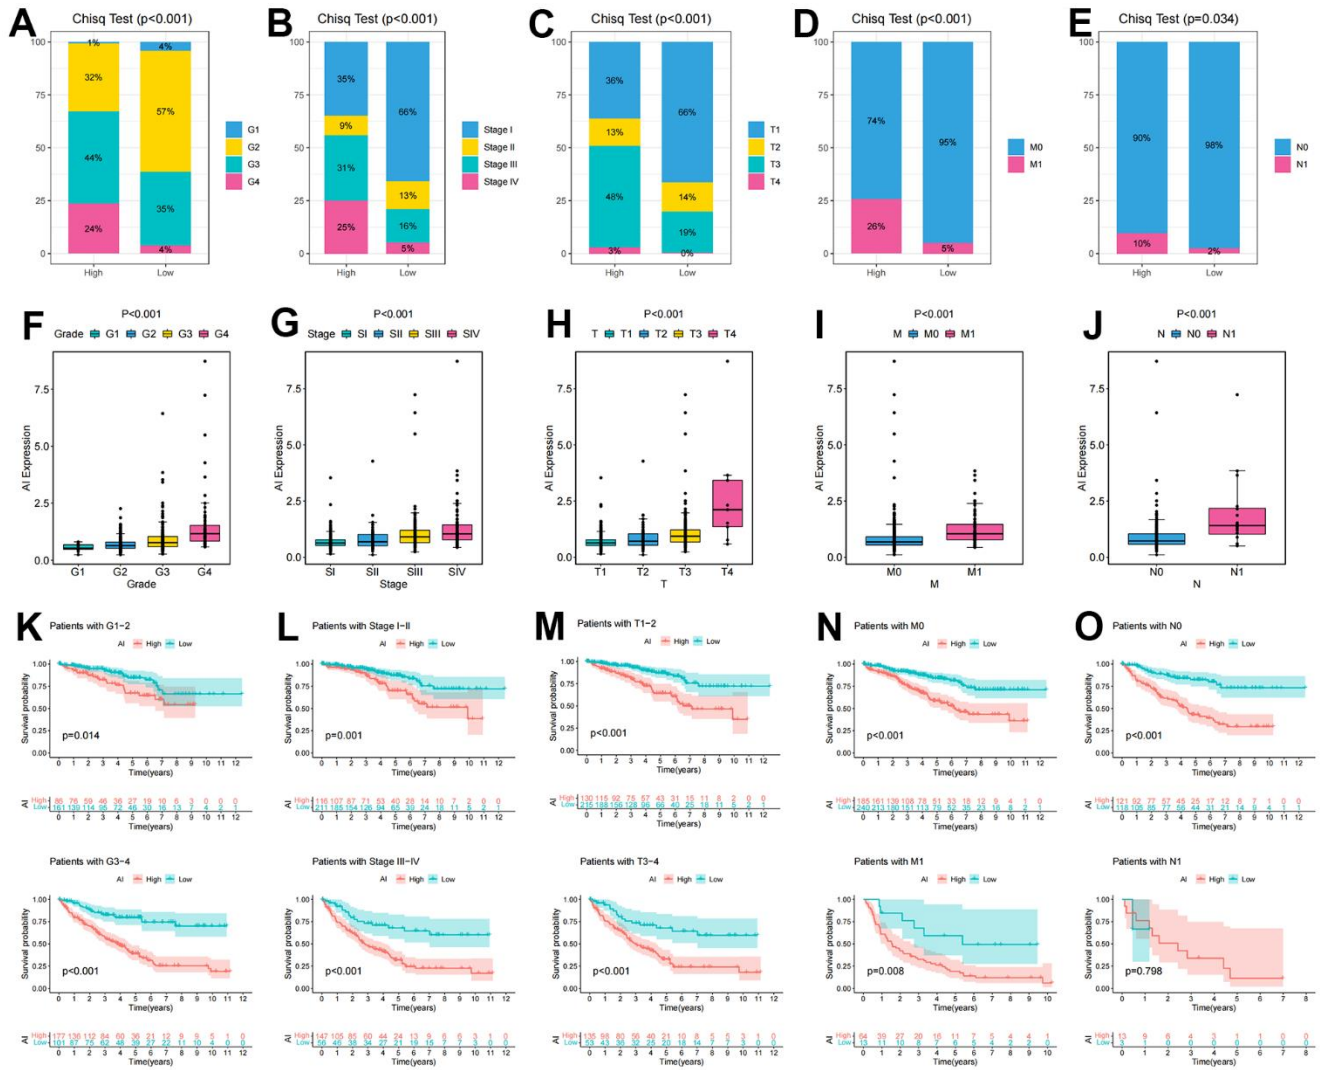

**Supplementary Figure 1. Correlation of anoikis index with clinicopathological features in ccRCC.** (A–E) The histogram showing the proportion of clinicopathological variables in the high and low AI groups (A) Grade; (B) Stage; (C) T stage; (D) M stage; (E) N stage; (F–J) Differences in AI among clinicopathological variables (F) Grade; (G) Stage; (H) T stage; (I) M stage; (J) N stage; (K–O) KM survival curves showing OS of AI in various clinicopathological characteristics, including TNM stage, pathological stage, age and gender of patients (K) Grade; (L) Stage; (M) T stage; (N) M stage; (O) N stage.

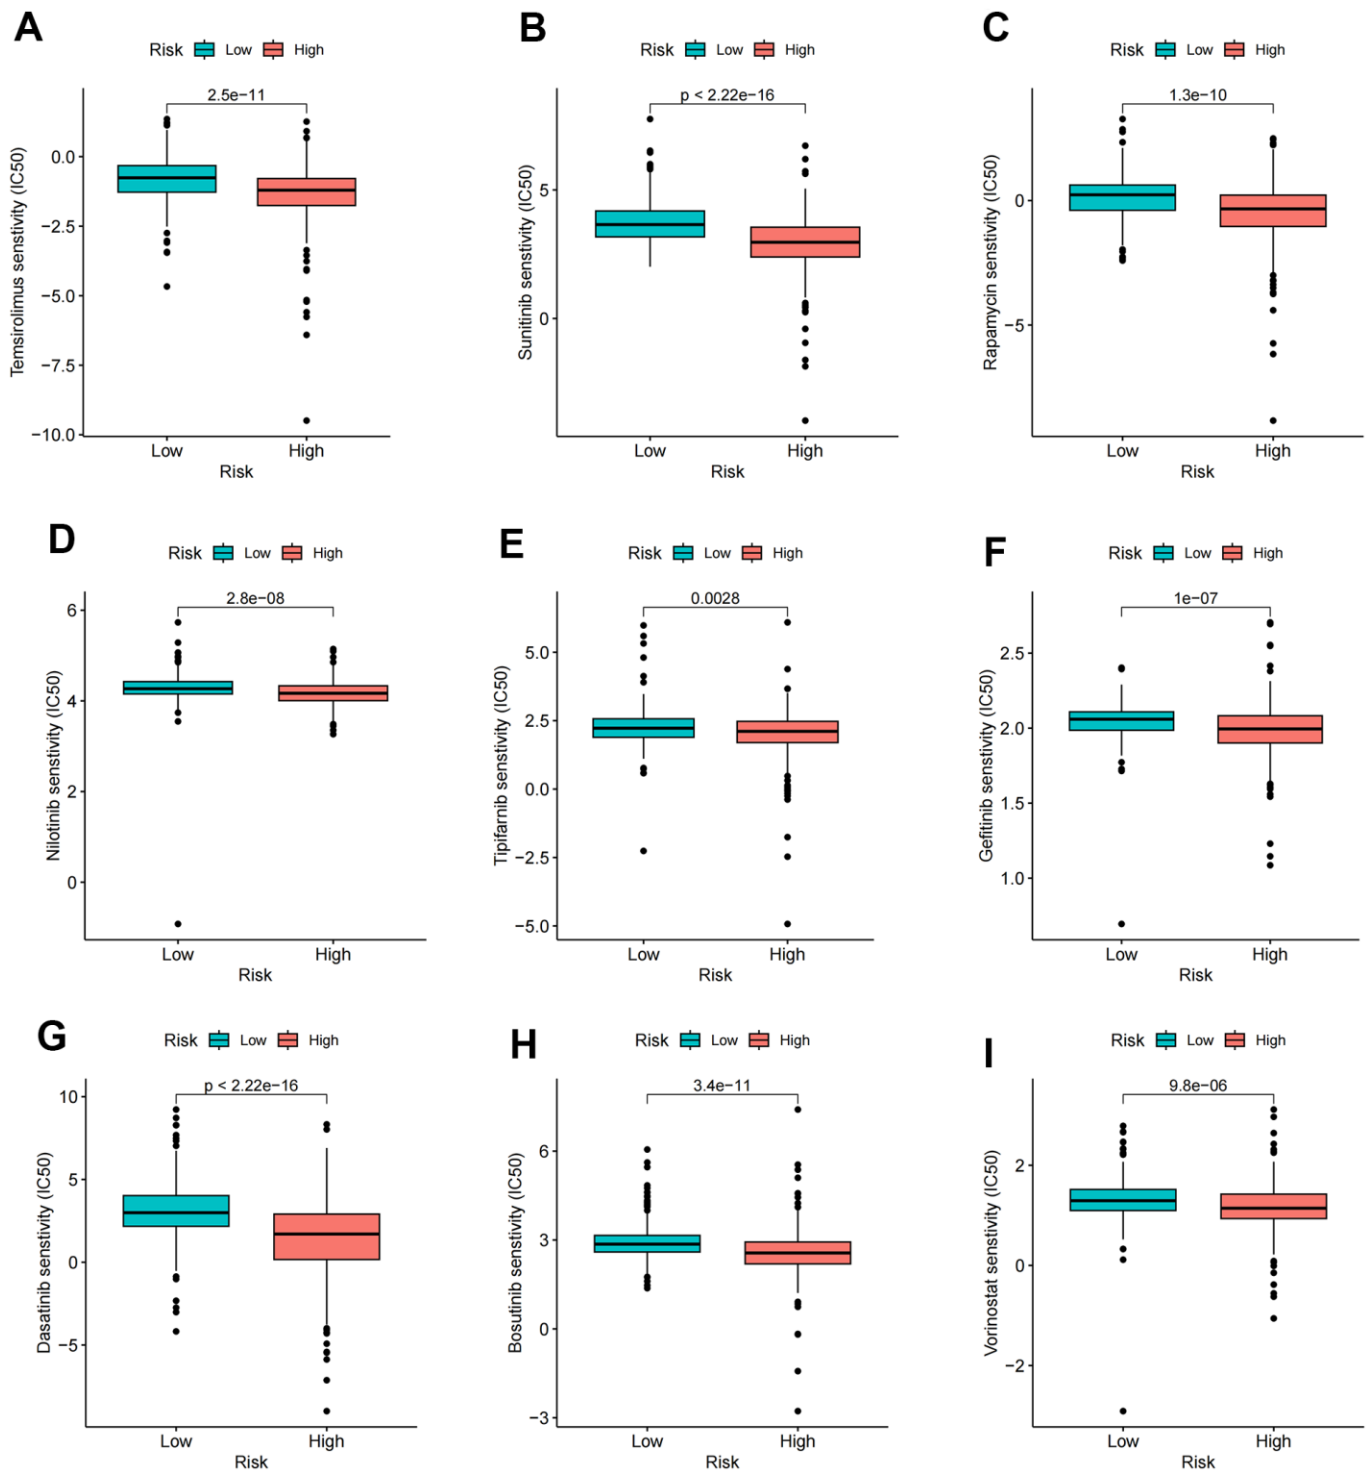

**Supplementary Figure 2. Correlation between TIMP1 and drug sensitivity.** (A–I) Correlation analysis of TIMP1 expression profile and drug sensitivity. (A) Temsirolimus; (B) Sunitinib; (C) Rapamycin; (D) Nilotinib; (E) Tipifarnib; (F) Gefitinib; (G) Dasatinib; (H) Bosutinib; (I) Vorinostat.
